# Supplementary material
Source: Springer Nature journal article supplement (https://www.springermedizin.de/resource/supplementary/10194_2014_609_MOESM1_ESM.pdf/9423274)

BMI

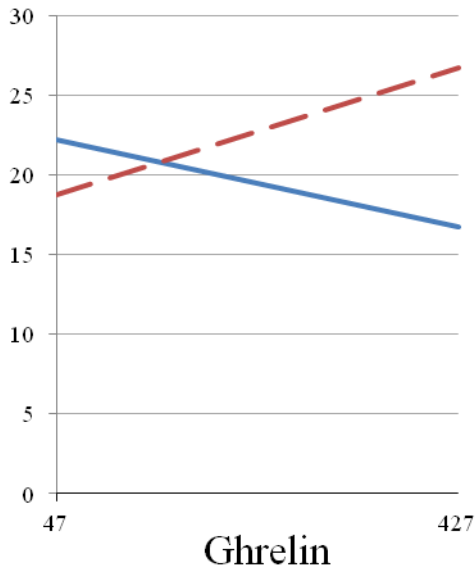

— Not Depressed

- - Depressed

Supplement: MOESM1 [file 9423274]
